# Supplementary material
Source: PubMed Central journal article supplement (PMC11062814)
Supplement: NIHMS1970930-supplement-1.pdf [file NIHMS1970930-supplement-1.pdf]

## **Supplemental Methods:**

**Biomarker Assays:** At time of assessment participants provided a fasting blood sample which was processed for serum and frozen at -80 degrees Celsius. All assays were completed by the CLIA licensed Cytokine Reference Laboratory (University of Minnesota) on either Luminex multiplex or ELISA platforms with the exception of hs-HS-CRP and homocysteine which were measured as part of the routine clinical exam by ARUP laboratories. Samples were tested for IFN $\gamma$ , IL-6, TNF $\alpha$ , NTproBNP, Troponin I and Troponin T using Luminex multiplex platforms (R&D Systems, Minneapolis MN cat. #LHSCM000; EMD Millipore, Billerica MA cat. #HCVD1MAG-67K-02 and HCVD4MAG-67K-01). Samples were analyzed for oxidized LDL, malondialdehyde, and glutathione peroxidase using ELISA (Merckodia, Uppsala, Sweden cat. #10-1143-01; R&D Systems, Minneapolis MN cat. #KGE013; BioAssay Systems, Hayward CA cat. #EGPX-100). Samples were run in duplicate and values were interpolated from 5-parameter and 4-parameter fitted standard curves. Intra- and inter-assay coefficients of variation were below 20%.
