# Supplementary material
Source: PubMed Central journal article supplement (PMC11062814)
Supplement: NIHMS1970930-supplement-3.pdf [file NIHMS1970930-supplement-3.pdf]

**Supplemental Table 1:** Mean neurocognitive Z-scores for any neuropsychological outcome where Hodgkin lymphoma survivors performed significantly worse than community controls after adjustment for multiple comparisons.

| Domain                                                   | Neurocognitive Outcome      | Neuropsychological Assessment                               | Survivors |             | Controls |             | p-value <sup>1</sup> |
|----------------------------------------------------------|-----------------------------|-------------------------------------------------------------|-----------|-------------|----------|-------------|----------------------|
|                                                          |                             |                                                             | n         | Mean (SD)   | n        | Mean (SD)   |                      |
| <b>Academics</b>                                         | Word Reading                | Woodcock Johnson-III Letter-Word Identification             | 191       | -0.23(0.56) | 195      | -0.07(0.50) | 0.003                |
| <b>Attention</b>                                         | Focused Attention           | Trail Making Test A                                         | 196       | 0.36(0.95)  | 198      | 0.53(0.85)  | 0.062                |
|                                                          | Sustained Attention         | Conner's Performance Test II Omissions                      | 190       | -0.11(1.36) | 196      | 0.21(0.90)  | 0.005                |
| <b>Processing Speed</b>                                  | Visuomotor Processing Speed | Wechsler Adult Intelligence Scale-III/IV Coding             | 193       | 0.13(0.97)  | 198      | 0.40(0.94)  | 0.005                |
|                                                          | Motor Processing Speed      | Grooved Pegboard Dominant Hand                              | 196       | -0.38(1.06) | 198      | -0.01(0.91) | <0.001               |
|                                                          | Visual Processing Speed     | Wechsler Adult Intelligence Scale -III/IV Symbol Search     | 192       | 0.26(0.98)  | 196      | 0.61(0.98)  | <0.001               |
| <b>Memory</b>                                            | Verbal Learning             | California Verbal Learning Test-II Trials 1-5 Total         | 192       | -0.09(1.03) | 198      | 0.31(1.02)  | <0.001               |
|                                                          | Short-Term Verbal Recall    | California Verbal Learning Test -II Short Delay Free Recall | 186       | -0.25(1.00) | 188      | 0.11(1.05)  | <0.001               |
|                                                          | Long-Term Verbal Recall     | California Verbal Learning Test -II Long Delay Free Recall  | 191       | -0.31(1.11) | 198      | 0.08(1.10)  | <0.001               |
| <b>Executive Function</b>                                | Cognitive Flexibility       | Trail Making Test B                                         | 195       | -0.04(1.27) | 198      | 0.27(1.12)  | 0.011                |
| <sup>1</sup> Generalized Linear models adjusted for sex. |                             |                                                             |           |             |          |             |                      |
