# Supplementary material
Source: PubMed Central journal article supplement (PMC11062814)
Supplement: NIHMS1970930-supplement-4.pdf [file NIHMS1970930-supplement-4.pdf]

**Supplemental Table 2:** Associations between clinical, demographic, and treatment exposures and serum biomarkers among survivors of Hodgkin lymphoma.

|                                                                     | <b>IL-6</b>                        | <b>TNF-a</b>          | <b>OxLDL</b>          | <b>MDA</b>            | <b>GPx</b>            | <b>hs-HS-CRP</b>                   | <b>Homocysteine</b>                   |
|---------------------------------------------------------------------|------------------------------------|-----------------------|-----------------------|-----------------------|-----------------------|------------------------------------|---------------------------------------|
|                                                                     | $\beta$ (95%CI)                    | $\beta$ (95%CI)       | $\beta$ (95%CI)       | $\beta$ (95%CI)       | $\beta$ (95%CI)       | $\beta$ (95%CI)                    | $\beta$ (95%CI)                       |
| Female (vs. Male)                                                   | 0.34<br>(-0.31,0.98)               | -0.09<br>(-0.40,0.22) | 0.05<br>(-0.12,0.22)  | -0.36<br>(-0.95,0.22) | 0.14<br>(-0.09,0.36)  | -0.09<br>(-0.45,0.27)              | <b>-0.15</b><br><b>(-0.25,-0.05)*</b> |
| Age at Diagnosis (per 1 year)                                       | 0.04<br>(-0.05,0.13)               | 0.03<br>(-0.02,0.07)  | -0.01<br>(-0.04,0.01) | 0.05<br>(-0.03,0.13)  | -0.00<br>(-0.03,0.03) | -0.00<br>(-0.05,0.05)              | 0.00<br>(-0.01,0.02)                  |
| Time since Diagnosis (per 1 year)                                   | <b>0.08</b><br><b>(0.01,0.16)*</b> | 0.01<br>(-0.02,0.05)  | 0.01<br>(-0.01,0.03)  | 0.05<br>(-0.02,0.12)  | 0.00<br>(-0.02,0.03)  | -0.01<br>(-0.05,0.03)              | <b>0.01</b><br><b>(-0.00,0.02)**</b>  |
| Cumulative Anthracycline Dose (per 100mg/m <sup>2</sup> )           | 0.16<br>(-0.41,0.72)               | -0.17<br>(-0.45,0.10) | 0.01<br>(-0.14,0.16)  | -0.05<br>(-0.56,0.46) | 0.06<br>(-0.13,0.26)  | -0.16<br>(-0.47,0.16)              | 0.03<br>(-0.06,0.11)                  |
| Cumulative Vinblastine/Vincristine Dose (per 100mg/m <sup>2</sup> ) | -0.42<br>(-2.40,1.57)              | 0.37<br>(-0.58,1.33)  | 0.12<br>(-0.40,0.64)  | -0.72<br>(-2.51,1.08) | 0.07<br>(-0.61,0.75)  | <b>1.11</b><br><b>(0.02,2.20)*</b> | 0.02<br>(-0.28,0.31)                  |
| Chest/Neck Radiation                                                |                                    |                       |                       |                       |                       |                                    |                                       |
| >30Gy vs <24Gy                                                      | 0.13<br>(-0.93,1.19)               | 0.20<br>(-0.31,0.72)  | 0.15<br>(-0.12,0.43)  | -0.61<br>(-1.57,0.35) | 0.00<br>(-0.36,0.37)  | <b>0.65</b><br><b>(0.07,1.23)*</b> | <b>0.23</b><br><b>(0.07,0.39)*</b>    |
| 24-30Gy vs <24Gy                                                    | -0.33<br>(-1.35,0.68)              | -0.03<br>(-0.52,0.46) | 0.05<br>(-0.22,0.31)  | 0.30<br>(-0.62,1.22)  | -0.19<br>(-0.54,0.16) | 0.17<br>(-0.39,0.73)               | -0.06<br>(-0.21,0.09)                 |
| Bleomycin (Yes vs No)                                               | -0.64<br>(-1.67,0.38)              | 0.11<br>(-0.39,0.60)  | 0.11<br>(-0.16,0.38)  | -0.22<br>(-1.15,0.71) | 0.20<br>(-0.15,0.55)  | -0.29<br>(-0.87,0.28)              | 0.06<br>(-0.10,0.22)                  |
| Cyclophosphamide (Yes vs No)                                        | 0.17<br>(-0.59,0.93)               | -0.15<br>(-0.51,0.22) | -0.05<br>(-0.25,0.15) | 0.15<br>(-0.54,0.85)  | -0.15<br>(-0.42,0.11) | 0.13<br>(-0.29,0.56)               | 0.05<br>(-0.07,0.17)                  |
| Methotrexate IV (Yes vs No)                                         | -0.73<br>(-1.77,0.32)              | -0.23<br>(-0.73,0.28) | 0.04<br>(-0.23,0.32)  | -0.40<br>(-1.34,0.55) | 0.16<br>(-0.20,0.52)  | -0.23<br>(-0.83,0.36)              | 0.03<br>(-0.13,0.19)                  |
| Prednisone (Yes vs No)                                              | 0.56<br>(-0.60,1.73)               | 0.35<br>(-0.22,0.91)  | 0.03<br>(-0.28,0.33)  | 0.74<br>(-0.32,1.79)  | -0.21<br>(-0.61,0.19) | 0.20<br>(-0.44,0.85)               | 0.12<br>(-0.06,0.29)                  |
| Development of Secondary Neoplasm (Yes vs No)                       | -0.16<br>(-0.96,0.65)              | -0.03<br>(-0.42,0.36) | -0.03<br>(-0.24,0.18) | -0.17<br>(-0.91,0.56) | -0.23<br>(-0.50,0.05) | 0.09<br>(-0.36,0.54)               | -0.12<br>(-0.24,0.01)                 |

\* indicates p<0.05; \*\* indicates p<0.10

Biomarkers were natural log transformed and results reported have not been back-transformed. All of the factors above were included in one multivariate model for each biomarker outcome, models were additionally adjusted for age, race, smoking, BMI, anti-inflammatory/steroid, recent infection.

**Supplemental Table 2 Continued:**

|                                                                                                                                                                                                                                                                                                                                                                            | <b>Absolute Lymphocyte Count</b> | <b>Platelets</b>           |
|----------------------------------------------------------------------------------------------------------------------------------------------------------------------------------------------------------------------------------------------------------------------------------------------------------------------------------------------------------------------------|----------------------------------|----------------------------|
| Female (vs. Male)                                                                                                                                                                                                                                                                                                                                                          | -0.00(-0.12,0.12)                | 0.07(-0.01,0.15)           |
| Age at Diagnosis<br>(per 1 year)                                                                                                                                                                                                                                                                                                                                           | -0.01(-0.03,0.01)                | 0.00(-0.01,0.01)           |
| Time since Diagnosis<br>(per 1 year)                                                                                                                                                                                                                                                                                                                                       | -0.01(-0.03,0.00)                | 0.00(-0.01,0.01)           |
| Cumulative Anthracycline Dose<br>(per 100mg/m <sup>2</sup> )                                                                                                                                                                                                                                                                                                               | -0.04(-0.14,0.07)                | 0.00(-0.07,0.07)           |
| Cumulative Vinblastine/Vincristine Dose<br>(per 100mg/m <sup>2</sup> )                                                                                                                                                                                                                                                                                                     | 0.25(-0.13,0.62)                 | -0.04(-0.29,0.21)          |
| Chest/Neck Radiation                                                                                                                                                                                                                                                                                                                                                       |                                  |                            |
| >30Gy vs <24Gy                                                                                                                                                                                                                                                                                                                                                             | -0.20(-0.40,0.00)**              | <b>-0.15(-0.28,-0.02)*</b> |
| 24-30Gy vs <24Gy                                                                                                                                                                                                                                                                                                                                                           | -0.11(-0.29,0.08)                | -0.09(-0.21,0.04)          |
| Bleomycin<br>(Yes vs No)                                                                                                                                                                                                                                                                                                                                                   | -0.03(-0.22,0.16)                | 0.01(-0.12,0.14)           |
| Cyclophosphamide<br>(Yes vs No)                                                                                                                                                                                                                                                                                                                                            | -0.13(-0.27,0.01)                | 0.01(-0.08,0.11)           |
| Methotrexate IV<br>(Yes vs No)                                                                                                                                                                                                                                                                                                                                             | -0.08(-0.28,0.11)                | -0.04(-0.17,0.09)          |
| Prednisone<br>(Yes vs No)                                                                                                                                                                                                                                                                                                                                                  | <b>-0.31(-0.53,-0.08)*</b>       | <b>-0.15(-0.30,-0.01)*</b> |
| Development of Secondary Neoplasm<br>(Yes vs No)                                                                                                                                                                                                                                                                                                                           | -0.10(-0.25,0.05)                | -0.03(-0.13,0.07)          |
| <p>* indicates p&lt;0.05; ** indicates p&lt;0.10<br/>           Biomarkers were natural log transformed and results reported have not been back-transformed. All of the factors above were included in one multivariable model for each biomarker outcome, models were additionally adjusted for age, race, smoking, BMI, anti-inflammatory/steroid, recent infection.</p> |                                  |                            |
