# Supplementary material
Source: PubMed Central journal article supplement (PMC11062814)
Supplement: NIHMS1970930-supplement-5.pdf [file NIHMS1970930-supplement-5.pdf]

**Supplemental Table 3:** Mean difference and 95%CI in neurocognitive z-scores among those in the third or second tertile of biomarker concentration compare to the first tertile. Models were adjusted for age, sex, race, body mass index, anti-inflammatory/steroid use, and recent infection.<sup>1</sup>

| Neurocognitive Outcome        | Biomarker Tertile <sup>2</sup> (vs. Tertile 1) | HL<br>IL-6                           |              | Control<br>IL-6       |         | HL<br>TNF-a                       |              | Control<br>TNF-a      |         |
|-------------------------------|------------------------------------------------|--------------------------------------|--------------|-----------------------|---------|-----------------------------------|--------------|-----------------------|---------|
|                               |                                                | $\beta$ (95%CI)                      | p-value      | $\beta$ (95%CI)       | p-value | $\beta$ (95%CI)                   | p-value      | $\beta$ (95%CI)       | p-value |
| Word Reading                  | Tertile 3                                      | -0.16<br>(-0.37,0.06)                | 0.151        | -0.02<br>(-0.22,0.17) | 0.828   | -0.06<br>(-0.25,0.13)             | 0.539        | -0.09<br>(-0.27,0.08) | 0.299   |
|                               | Tertile 2                                      | -0.13<br>(-0.36,0.11)                | 0.289        | -0.04<br>(-0.21,0.14) | 0.688   | 0.03<br>(-0.17,0.23)              | 0.771        | -0.02<br>(-0.19,0.15) | 0.788   |
| Focused Attention             | Tertile 3                                      | -0.19<br>(-0.56,0.17)                | 0.303        | -0.08<br>(-0.39,0.24) | 0.644   | -0.06<br>(-0.40,0.27)             | 0.701        | -0.04<br>(-0.33,0.24) | 0.763   |
|                               | Tertile 2                                      | -0.05<br>(-0.45,0.35)                | 0.803        | 0.14<br>(-0.14,0.42)  | 0.334   | 0.08<br>(-0.26,0.42)              | 0.638        | 0.21<br>(-0.07,0.48)  | 0.147   |
| Sustained Attention           | Tertile 3                                      | -0.30<br>(-0.84,0.24)                | 0.273        | -0.14<br>(-0.47,0.20) | 0.426   | -0.31<br>(-0.78,0.17)             | 0.207        | -0.00<br>(-0.30,0.29) | 0.982   |
|                               | Tertile 2                                      | 0.04<br>(-0.55,0.62)                 | 0.901        | -0.15<br>(-0.44,0.15) | 0.334   | 0.27<br>(-0.24,0.77)              | 0.298        | -0.21<br>(-0.50,0.09) | 0.169   |
| Visual-Motor Processing Speed | Tertile 3                                      | <b>-0.39</b><br><b>(-0.75,-0.03)</b> | <b>0.037</b> | -0.31<br>(-0.66,0.04) | 0.087   | -0.10<br>(-0.42,0.23)             | 0.568        | -0.23<br>(-0.54,0.09) | 0.158   |
|                               | Tertile 2                                      | -0.01<br>(-0.41,0.38)                | 0.956        | -0.16<br>(-0.47,0.15) | 0.305   | 0.27<br>(-0.07,0.61)              | 0.125        | -0.12<br>(-0.43,0.19) | 0.435   |
| Motor Processing Speed        | Tertile 3                                      | -0.17<br>(-0.58,0.23)                | 0.402        | -0.01<br>(-0.38,0.37) | 0.978   | 0.06<br>(-0.31,0.42)              | 0.763        | -0.06<br>(-0.39,0.28) | 0.734   |
|                               | Tertile 2                                      | -0.05<br>(-0.50,0.40)                | 0.826        | -0.09<br>(-0.42,0.24) | 0.598   | 0.31<br>(-0.07,0.68)              | 0.113        | 0.11<br>(-0.22,0.44)  | 0.520   |
| Visual Processing Speed       | Tertile 3                                      | -0.19<br>(-0.56,0.17)                | 0.300        | -0.12<br>(-0.43,0.20) | 0.462   | -0.21<br>(-0.53,0.11)             | 0.206        | -0.08<br>(-0.36,0.20) | 0.589   |
|                               | Tertile 2                                      | -0.08<br>(-0.48,0.32)                | 0.685        | 0.04<br>(-0.23,0.32)  | 0.755   | 0.26<br>(-0.08,0.60)              | 0.140        | 0.02<br>(-0.25,0.30)  | 0.870   |
| Verbal Learning               | Tertile 3                                      | 0.07<br>(-0.33,0.46)                 | 0.742        | 0.02<br>(-0.37,0.41)  | 0.915   | -0.20<br>(-0.56,0.15)             | 0.261        | 0.10<br>(-0.26,0.45)  | 0.593   |
|                               | Tertile 2                                      | 0.17<br>(-0.26,0.60)                 | 0.442        | -0.26<br>(-0.60,0.08) | 0.142   | 0.10<br>(-0.27,0.47)              | 0.601        | 0.06<br>(-0.29,0.40)  | 0.751   |
| Short-Term Recall             | Tertile 3                                      | 0.07<br>(-0.32,0.47)                 | 0.721        | -0.05<br>(-0.46,0.37) | 0.825   | -0.11<br>(-0.46,0.25)             | 0.554        | -0.09<br>(-0.46,0.28) | 0.632   |
|                               | Tertile 2                                      | 0.15<br>(-0.28,0.58)                 | 0.494        | -0.12<br>(-0.49,0.25) | 0.522   | 0.34<br>(-0.03,0.72)              | 0.073        | -0.15<br>(-0.52,0.22) | 0.422   |
| Long-Term Recall              | Tertile 3                                      | 0.16<br>(-0.28,0.60)                 | 0.473        | -0.11<br>(-0.54,0.32) | 0.609   | -0.08<br>(-0.46,0.30)             | 0.685        | -0.19<br>(-0.58,0.19) | 0.326   |
|                               | Tertile 2                                      | 0.29<br>(-0.19,0.77)                 | 0.234        | -0.27<br>(-0.65,0.10) | 0.160   | <b>0.52</b><br><b>(0.12,0.92)</b> | <b>0.012</b> | -0.19<br>(-0.56,0.19) | 0.324   |
| Cognitive Flexibility         | Tertile 3                                      | -0.35<br>(-0.84,0.14)                | 0.161        | -0.09<br>(-0.51,0.33) | 0.680   | -0.02<br>(-0.47,0.42)             | 0.913        | -0.12<br>(-0.49,0.25) | 0.527   |
|                               | Tertile 2                                      | -0.01<br>(-0.55,0.52)                | 0.967        | 0.07<br>(-0.30,0.43)  | 0.720   | 0.14<br>(-0.32,0.60)              | 0.564        | -0.14<br>(-0.51,0.22) | 0.452   |

|                               |                                                | HL                         |              | Control                    |                  | HL                 |         | Control                 |              |
|-------------------------------|------------------------------------------------|----------------------------|--------------|----------------------------|------------------|--------------------|---------|-------------------------|--------------|
|                               |                                                | Malondialdehyde            |              | Malondialdehyde            |                  | OxLDL              |         | OxLDL                   |              |
| Neurocognitive Outcome        | Biomarker Tertile <sup>2</sup> (vs. Tertile 1) | $\beta$ (95%CI)            | p-value      | $\beta$ (95%CI)            | p-value          | $\beta$ (95%CI)    | p-value | $\beta$ (95%CI)         | p-value      |
| Word Reading                  | Tertile 3                                      | -0.14 (-0.34,0.05)         | 0.158        | -0.04 (-0.21,0.13)         | 0.635            | -0.12 (-0.32,0.08) | 0.245   | 0.04 (-0.13,0.21)       | 0.672        |
|                               | Tertile 2                                      | <b>-0.20 (-0.38,-0.02)</b> | <b>0.030</b> | -0.07 (-0.23,0.10)         | 0.443            | -0.01 (-0.23,0.21) | 0.937   | 0.09 (-0.08,0.26)       | 0.313        |
| Focused Attention             | Tertile 3                                      | <b>-0.36 (-0.70,-0.02)</b> | <b>0.042</b> | -0.12 (-0.40,0.16)         | 0.415            | 0.02 (-0.33,0.37)  | 0.905   | 0.05 (-0.23,0.33)       | 0.731        |
|                               | Tertile 2                                      | -0.24 (-0.55,0.07)         | 0.124        | -0.19 (-0.47,0.08)         | 0.169            | 0.10 (-0.28,0.49)  | 0.592   | 0.19 (-0.09,0.47)       | 0.185        |
| Sustained Attention           | Tertile 3                                      | -0.08 (-0.59,0.43)         | 0.752        | -0.07 (-0.36,0.21)         | 0.616            | 0.03 (-0.49,0.54)  | 0.916   | 0.06 (-0.24,0.35)       | 0.708        |
|                               | Tertile 2                                      | 0.12 (-0.34,0.59)          | 0.599        | -0.43 (-0.71,-0.15)        | <b>0.003</b>     | -0.06 (-0.62,0.51) | 0.847   | -0.11 (-0.40,0.19)      | 0.478        |
| Visual-Motor Processing Speed | Tertile 3                                      | -0.11 (-0.46,0.24)         | 0.526        | -0.25 (-0.56,0.07)         | 0.125            | 0.07 (-0.28,0.42)  | 0.702   | 0.15 (-0.16,0.46)       | 0.355        |
|                               | Tertile 2                                      | -0.19 (-0.51,0.12)         | 0.230        | -0.16 (-0.46,0.15)         | 0.309            | -0.04 (-0.42,0.35) | 0.844   | 0.11 (-0.20,0.42)       | 0.481        |
| Motor Processing Speed        | Tertile 3                                      | -0.16 (-0.55,0.22)         | 0.408        | 0.04 (-0.30,0.37)          | 0.826            | 0.20 (-0.18,0.59)  | 0.300   | -0.16 (-0.49,0.17)      | 0.330        |
|                               | Tertile 2                                      | -0.06 (-0.40,0.29)         | 0.748        | -0.17 (-0.49,0.16)         | 0.313            | 0.24 (-0.18,0.67)  | 0.262   | 0.10 (-0.23,0.43)       | 0.548        |
| Visual Processing Speed       | Tertile 3                                      | <b>-0.39 (-0.74,-0.05)</b> | <b>0.027</b> | -0.26 (-0.52,0.01)         | 0.063            | 0.22 (-0.13,0.57)  | 0.226   | <b>0.28 (0.00,0.55)</b> | <b>0.049</b> |
|                               | Tertile 2                                      | -0.21 (-0.52,0.11)         | 0.198        | <b>-0.55 (-0.81,-0.29)</b> | <b>&lt;.0001</b> | 0.15 (-0.23,0.54)  | 0.437   | 0.20 (-0.08,0.47)       | 0.159        |
| Verbal Learning               | Tertile 3                                      | -0.17 (-0.55,0.20)         | 0.363        | -0.32 (-0.66,0.02)         | 0.068            | 0.23 (-0.14,0.61)  | 0.228   | 0.18 (-0.16,0.53)       | 0.298        |
|                               | Tertile 2                                      | -0.27 (-0.61,0.07)         | 0.120        | -0.16 (-0.50,0.17)         | 0.345            | 0.16 (-0.26,0.57)  | 0.460   | 0.19 (-0.15,0.54)       | 0.267        |
| Short-Term Recall             | Tertile 3                                      | -0.10 (-0.48,0.28)         | 0.602        | <b>-0.42 (-0.78,-0.05)</b> | <b>0.026</b>     | 0.24 (-0.14,0.62)  | 0.223   | 0.30 (-0.06,0.66)       | 0.103        |
|                               | Tertile 2                                      | -0.24 (-0.58,0.10)         | 0.171        | -0.24 (-0.60,0.12)         | 0.189            | 0.08 (-0.34,0.50)  | 0.720   | 0.33 (-0.03,0.70)       | 0.078        |
| Long-Term Recall              | Tertile 3                                      | -0.34 (-0.76,0.07)         | 0.104        | -0.37 (-0.75,0.00)         | 0.054            | 0.28 (-0.13,0.70)  | 0.184   | 0.19 (-0.19,0.56)       | 0.336        |
|                               | Tertile 2                                      | -0.33 (-0.71,0.04)         | 0.082        | -0.20 (-0.57,0.17)         | 0.290            | 0.33 (-0.13,0.78)  | 0.163   | 0.22 (-0.15,0.60)       | 0.245        |
| Cognitive Flexibility         | Tertile 3                                      | -0.15 (-0.62,0.32)         | 0.529        | -0.16 (-0.53,0.20)         | 0.381            | -0.03 (-0.50,0.44) | 0.894   | -0.06 (-0.42,0.31)      | 0.756        |
|                               | Tertile 2                                      | -0.12 (-0.54,0.30)         | 0.563        | -0.32 (-0.68,0.04)         | 0.084            | 0.18 (-0.33,0.70)  | 0.483   | 0.12 (-0.25,0.48)       | 0.530        |

| Neurocognitive Outcome        | Biomarker Tertile <sup>2</sup> (vs. Tertile 1) | HL                     |              | Control                |         | HL                        |              | Control                   |              |
|-------------------------------|------------------------------------------------|------------------------|--------------|------------------------|---------|---------------------------|--------------|---------------------------|--------------|
|                               |                                                | Glutathione Peroxidase |              | Glutathione Peroxidase |         | Homocysteine              |              | Homocysteine              |              |
|                               |                                                | $\beta$ (95%CI)        | p-value      | $\beta$ (95%CI)        | p-value | $\beta$ (95%CI)           | p-value      | $\beta$ (95%CI)           | p-value      |
| Word Reading                  | Tertile 3                                      | 0.02(-0.16,0.21)       | 0.818        | -0.08(-0.25,0.09)      | 0.375   | <b>-0.25(-0.46,-0.04)</b> | <b>0.020</b> | -0.18(-0.37,0.01)         | 0.060        |
|                               | Tertile 2                                      | 0.12(-0.11,0.35)       | 0.298        | -0.13(-0.30,0.04)      | 0.147   | -0.12(-0.32,0.09)         | 0.270        | -0.10(-0.28,0.09)         | 0.310        |
| Focused Attention             | Tertile 3                                      | 0.28(-0.04,0.59)       | 0.091        | -0.15(-0.44,0.13)      | 0.283   | -0.25(-0.63,0.12)         | 0.180        | -0.14(-0.45,0.18)         | 0.400        |
|                               | Tertile 2                                      | 0.16(-0.23,0.55)       | 0.421        | 0.07(-0.21,0.34)       | 0.646   | -0.02(-0.38,0.35)         | 0.930        | 0.01(-0.29,0.31)          | 0.940        |
| Sustained Attention           | Tertile 3                                      | -0.25(-0.72,0.22)      | 0.293        | 0.09(-0.21,0.38)       | 0.561   | -0.17(-0.72,0.39)         | 0.550        | -0.24(-0.57,0.09)         | 0.150        |
|                               | Tertile 2                                      | -0.34(-0.92,0.23)      | 0.241        | -0.03(-0.33,0.26)      | 0.835   | -0.07(-0.62,0.47)         | 0.800        | 0.11(-0.20,0.43)          | 0.490        |
| Visual-Motor Processing Speed | Tertile 3                                      | 0.13(-0.19,0.45)       | 0.431        | -0.05(-0.36,0.27)      | 0.773   | -0.36(-0.73,0.01)         | 0.057        | -0.17(-0.51,0.17)         | 0.330        |
|                               | Tertile 2                                      | 0.29(-0.10,0.69)       | 0.149        | 0.09(-0.22,0.40)       | 0.560   | -0.17(-0.53,0.19)         | 0.360        | -0.04(-0.36,0.29)         | 0.830        |
| Motor Processing Speed        | Tertile 3                                      | 0.16(-0.20,0.51)       | 0.385        | -0.05(-0.39,0.28)      | 0.753   | -0.21(-0.63,0.21)         | 0.320        | -0.11(-0.42,0.20)         | 0.480        |
|                               | Tertile 2                                      | 0.09(-0.35,0.53)       | 0.688        | -0.06(-0.39,0.27)      | 0.724   | -0.02(-0.43,0.39)         | 0.920        | 0.03(-0.27,0.32)          | 0.850        |
| Visual Processing Speed       | Tertile 3                                      | 0.04(-0.28,0.35)       | 0.825        | -0.02(-0.30,0.25)      | 0.874   | -0.14(-0.50,0.23)         | 0.470        | -0.23(-0.60,0.13)         | 0.210        |
|                               | Tertile 2                                      | <b>0.42(0.03,0.81)</b> | <b>0.038</b> | 0.25(-0.02,0.52)       | 0.076   | -0.12(-0.48,0.24)         | 0.520        | -0.03(-0.38,0.32)         | 0.880        |
| Verbal Learning               | Tertile 3                                      | 0.00(-0.34,0.35)       | 0.991        | 0.21(-0.14,0.56)       | 0.238   | <b>-0.43(-0.83,-0.04)</b> | <b>0.032</b> | <b>-0.54(-0.92,-0.16)</b> | <b>0.006</b> |
|                               | Tertile 2                                      | 0.18(-0.25,0.60)       | 0.416        | 0.02(-0.33,0.36)       | 0.923   | <b>-0.43(-0.81,-0.05)</b> | <b>0.029</b> | -0.35(-0.72,0.01)         | 0.058        |
| Short-Term Recall             | Tertile 3                                      | -0.04(-0.39,0.31)      | 0.815        | 0.14(-0.22,0.51)       | 0.436   | -0.38(-0.77,0.02)         | 0.063        | -0.40(-0.82,0.01)         | 0.058        |
|                               | Tertile 2                                      | 0.31(-0.13,0.74)       | 0.165        | -0.06(-0.43,0.31)      | 0.752   | <b>-0.53(-0.92,-0.14)</b> | <b>0.008</b> | -0.19(-0.58,0.21)         | 0.350        |
| Long-Term Recall              | Tertile 3                                      | -0.11(-0.49,0.27)      | 0.564        | 0.21(-0.17,0.58)       | 0.289   | -0.33(-0.77,0.11)         | 0.150        | -0.24(-0.66,0.19)         | 0.280        |
|                               | Tertile 2                                      | 0.29(-0.18,0.75)       | 0.229        | 0.21(-0.16,0.59)       | 0.2700  | -0.29(-0.72,0.13)         | 0.180        | -0.01(-0.41,0.40)         | 0.980        |
| Cognitive Flexibility         | Tertile 3                                      | 0.18(-0.25,0.61)       | 0.408        | -0.13(-0.50,0.23)      | 0.475   | -0.22(-0.69,0.26)         | 0.380        | -0.23(-0.64,0.18)         | 0.270        |
|                               | Tertile 2                                      | 0.33(-0.20,0.85)       | 0.227        | -0.00(-0.37,0.36)      | 0.980   | -0.01(-0.48,0.45)         | 0.960        | 0.03(-0.36,0.42)          | 0.870        |

|                               |                                                | HL                |         | Control           |         | HL                |         | Control           |         |
|-------------------------------|------------------------------------------------|-------------------|---------|-------------------|---------|-------------------|---------|-------------------|---------|
|                               |                                                | Troponin T        |         | Troponin T        |         | Troponin I        |         | Troponin I        |         |
| Neurocognitive Outcome        | Biomarker Tertile <sup>2</sup> (vs. Tertile 1) | $\beta$ (95%CI)   | p-value |
| Word Reading                  | Tertile 3                                      | 0.20(-0.02,0.41)  | 0.073   | 0.05(-0.11,0.22)  | 0.526   | -0.09(-0.30,0.11) | 0.366   | 0.08(-0.09,0.25)  | 0.350   |
|                               | Tertile 2                                      | 0.16(-0.04,0.36)  | 0.118   | -0.13(-0.30,0.04) | 0.136   | 0.02(-0.16,0.20)  | 0.806   | 0.13(-0.05,0.30)  | 0.151   |
| Focused Attention             | Tertile 3                                      | 0.16(-0.21,0.53)  | 0.385   | -0.03(-0.31,0.25) | 0.823   | -0.22(-0.58,0.13) | 0.212   | -0.10(-0.38,0.18) | 0.498   |
|                               | Tertile 2                                      | 0.26(-0.08,0.61)  | 0.134   | -0.08(-0.36,0.20) | 0.582   | -0.13(-0.44,0.17) | 0.389   | -0.17(-0.45,0.11) | 0.225   |
| Sustained Attention           | Tertile 3                                      | -0.27(-0.81,0.28) | 0.341   | -0.04(-0.34,0.25) | 0.782   | 0.09(-0.43,0.60)  | 0.747   | 0.16(-0.14,0.45)  | 0.298   |
|                               | Tertile 2                                      | -0.40(-0.90,0.11) | 0.124   | -0.01(-0.31,0.29) | 0.940   | -0.05(-0.50,0.40) | 0.828   | 0.23(-0.06,0.53)  | 0.117   |
| Visual-Motor Processing Speed | Tertile 3                                      | -0.03(-0.41,0.34) | 0.856   | 0.15(-0.16,0.46)  | 0.359   | -0.17(-0.53,0.18) | 0.336   | 0.02(-0.29,0.34)  | 0.878   |
|                               | Tertile 2                                      | -0.21(-0.56,0.13) | 0.229   | -0.06(-0.37,0.25) | 0.707   | 0.04(-0.27,0.34)  | 0.813   | 0.05(-0.26,0.36)  | 0.753   |
| Motor Processing Speed        | Tertile 3                                      | -0.07(-0.48,0.34) | 0.747   | 0.19(-0.14,0.52)  | 0.252   | 0.00(-0.39,0.40)  | 0.980   | -0.07(-0.40,0.26) | 0.679   |
|                               | Tertile 2                                      | 0.08(-0.30,0.46)  | 0.688   | 0.03(-0.30,0.36)  | 0.861   | -0.06(-0.40,0.28) | 0.715   | 0.14(-0.19,0.47)  | 0.421   |
| Visual Processing Speed       | Tertile 3                                      | 0.11(-0.26,0.49)  | 0.554   | 0.01(-0.27,0.28)  | 0.963   | -0.11(-0.46,0.25) | 0.553   | -0.13(-0.41,0.15) | 0.351   |
|                               | Tertile 2                                      | 0.18(-0.17,0.52)  | 0.322   | -0.10(-0.38,0.18) | 0.492   | -0.07(-0.38,0.23) | 0.636   | -0.07(-0.35,0.21) | 0.623   |
| Verbal Learning               | Tertile 3                                      | 0.11(-0.30,0.51)  | 0.601   | 0.15(-0.20,0.49)  | 0.409   | 0.10(-0.28,0.48)  | 0.593   | 0.16(-0.19,0.50)  | 0.365   |
|                               | Tertile 2                                      | -0.01(-0.39,0.36) | 0.943   | 0.02(-0.32,0.37)  | 0.891   | 0.12(-0.21,0.45)  | 0.470   | 0.10(-0.24,0.44)  | 0.568   |
| Short-Term Recall             | Tertile 3                                      | -0.01(-0.42,0.40) | 0.966   | 0.17(-0.20,0.53)  | 0.374   | 0.16(-0.22,0.54)  | 0.423   | 0.09(-0.28,0.46)  | 0.622   |
|                               | Tertile 2                                      | -0.07(-0.44,0.31) | 0.733   | 0.11(-0.27,0.48)  | 0.568   | 0.27(-0.07,0.60)  | 0.117   | 0.12(-0.25,0.49)  | 0.531   |
| Long-Term Recall              | Tertile 3                                      | 0.01(-0.44,0.46)  | 0.971   | 0.24(-0.14,0.61)  | 0.221   | 0.12(-0.30,0.54)  | 0.566   | 0.09(-0.29,0.47)  | 0.637   |
|                               | Tertile 2                                      | 0.06(-0.35,0.48)  | 0.770   | 0.08(-0.30,0.46)  | 0.672   | 0.07(-0.30,0.43)  | 0.728   | 0.13(-0.24,0.51)  | 0.490   |
| Cognitive Flexibility         | Tertile 3                                      | 0.08(-0.42,0.58)  | 0.761   | 0.19(-0.18,0.55)  | 0.317   | -0.33(-0.80,0.14) | 0.172   | 0.15(-0.22,0.51)  | 0.432   |
|                               | Tertile 2                                      | 0.15(-0.31,0.62)  | 0.518   | -0.01(-0.37,0.36) | 0.969   | -0.05(-0.46,0.36) | 0.811   | 0.06(-0.30,0.43)  | 0.730   |

|                               |                                                | HL                |         | Control           |         | HL                        |              | Control                   |              |
|-------------------------------|------------------------------------------------|-------------------|---------|-------------------|---------|---------------------------|--------------|---------------------------|--------------|
|                               |                                                | Lymphocyte        |         | Lymphocyte T      |         | Platelet                  |              | Platelet                  |              |
| Neurocognitive Outcome        | Biomarker Tertile <sup>2</sup> (vs. Tertile 1) | $\beta$ (95%CI)   | p-value | $\beta$ (95%CI)   | p-value | $\beta$ (95%CI)           | p-value      | $\beta$ (95%CI)           | p-value      |
| Word Reading                  | Tertile 3                                      | -0.07(-0.26,0.12) | 0.449   | -0.10(-0.27,0.08) | 0.272   | -0.03(-0.23,0.17)         | 0.788        | <b>-0.19(-0.38,-0.01)</b> | <b>0.044</b> |
|                               | Tertile 2                                      | -0.08(-0.29,0.13) | 0.448   | -0.04(-0.22,0.13) | 0.631   | <b>-0.25(-0.47,-0.03)</b> | <b>0.025</b> | -0.13(-0.31,0.06)         | 0.174        |
| Focused Attention             | Tertile 3                                      | -0.07(-0.39,0.25) | 0.686   | 0.15(-0.13,0.43)  | 0.288   | -0.08(-0.43,0.27)         | 0.650        | 0.03(-0.27,0.33)          | 0.865        |
|                               | Tertile 2                                      | 0.34(-0.01,0.69)  | 0.059   | 0.11(-0.18,0.39)  | 0.466   | -0.09(-0.47,0.29)         | 0.642        | -0.07(-0.37,0.22)         | 0.627        |
| Sustained Attention           | Tertile 3                                      | 0.14(-0.34,0.62)  | 0.561   | -0.12(-0.41,0.17) | 0.413   | 0.37(-0.14,0.88)          | 0.161        | -0.13(-0.44,0.19)         | 0.436        |
|                               | Tertile 2                                      | 0.06(-0.46,0.59)  | 0.816   | 0.04(-0.26,0.34)  | 0.795   | 0.40(-0.16,0.96)          | 0.163        | 0.03(-0.28,0.34)          | 0.838        |
| Visual-Motor Processing Speed | Tertile 3                                      | -0.01(-0.33,0.32) | 0.955   | -0.05(-0.36,0.26) | 0.756   | -0.05(-0.40,0.30)         | 0.764        | -0.13(-0.47,0.21)         | 0.440        |
|                               | Tertile 2                                      | 0.32(-0.03,0.68)  | 0.075   | 0.21(-0.10,0.53)  | 0.191   | 0.03(-0.35,0.41)          | 0.875        | 0.05(-0.28,0.39)          | 0.756        |
| Motor Processing Speed        | Tertile 3                                      | 0.20(-0.15,0.56)  | 0.264   | 0.02(-0.31,0.35)  | 0.916   | 0.20(-0.18,0.58)          | 0.312        | -0.32(-0.68,0.03)         | 0.077        |
|                               | Tertile 2                                      | 0.39(0.00,0.79)   | 0.050   | 0.16(-0.18,0.50)  | 0.357   | 0.11(-0.31,0.52)          | 0.615        | 0.05(-0.30,0.40)          | 0.790        |
| Visual Processing Speed       | Tertile 3                                      | -0.07(-0.40,0.26) | 0.677   | 0.20(-0.08,0.48)  | 0.160   | 0.02(-0.32,0.37)          | 0.889        | 0.18(-0.12,0.49)          | 0.235        |
|                               | Tertile 2                                      | 0.13(-0.23,0.48)  | 0.491   | 0.12(-0.17,0.40)  | 0.421   | 0.31(-0.07,0.68)          | 0.111        | 0.05(-0.25,0.35)          | 0.745        |
| Verbal Learning               | Tertile 3                                      | 0.00(-0.35,0.35)  | 0.983   | -0.15(-0.49,0.19) | 0.390   | 0.34(-0.04,0.71)          | 0.081        | -0.12(-0.49,0.26)         | 0.545        |
|                               | Tertile 2                                      | 0.10(-0.28,0.49)  | 0.602   | -0.06(-0.41,0.29) | 0.725   | 0.11(-0.30,0.51)          | 0.611        | -0.06(-0.43,0.31)         | 0.744        |
| Short-Term Recall             | Tertile 3                                      | -0.06(-0.41,0.30) | 0.755   | -0.14(-0.51,0.23) | 0.458   | 0.25(-0.13,0.63)          | 0.195        | -0.20(-0.58,0.19)         | 0.326        |
|                               | Tertile 2                                      | 0.08(-0.31,0.47)  | 0.685   | -0.11(-0.48,0.27) | 0.569   | -0.03(-0.44,0.37)         | 0.873        | -0.14(-0.52,0.25)         | 0.485        |
| Long-Term Recall              | Tertile 3                                      | -0.03(-0.42,0.36) | 0.882   | -0.16(-0.53,0.22) | 0.420   | 0.18(-0.24,0.60)          | 0.410        | -0.36(-0.77,0.05)         | 0.086        |
|                               | Tertile 2                                      | 0.01(-0.42,0.44)  | 0.973   | -0.07(-0.45,0.32) | 0.740   | -0.16(-0.62,0.29)         | 0.483        | -0.12(-0.52,0.28)         | 0.554        |
| Cognitive Flexibility         | Tertile 3                                      | -0.06(-0.49,0.38) | 0.802   | 0.06(-0.30,0.43)  | 0.730   | -0.02(-0.48,0.44)         | 0.939        | -0.04(-0.44,0.36)         | 0.848        |
|                               | Tertile 2                                      | 0.46(-0.01,0.93)  | 0.056   | 0.29(-0.09,0.66)  | 0.133   | -0.15(-0.66,0.35)         | 0.552        | 0.01(-0.38,0.40)          | 0.971        |

|                                  |                                      | HL                        |              | Controls          |         |
|----------------------------------|--------------------------------------|---------------------------|--------------|-------------------|---------|
|                                  |                                      | hs-HS-CRP                 |              | hs-HS-CRP         |         |
|                                  | HS-CRP <sup>3</sup><br>Concentration | $\beta$ (95%CI)           | p-value      | $\beta$ (95%CI)   | p-value |
| Word Reading                     | $\geq 3$                             | <b>-0.20(-0.37,-0.03)</b> | <b>0.022</b> | -0.05(-0.23,0.14) | 0.610   |
|                                  | <3                                   | 0.0 (ref.)                |              | 0.0 (ref.)        |         |
| Focused Attention                | $\geq 3$                             | -0.25(-0.54,0.05)         | 0.115        | -0.24(-0.54,0.07) | 0.1310  |
|                                  | <3                                   | 0.0 (ref.)                |              | 0.0 (ref.)        |         |
| Sustained Attention              | $\geq 3$                             | <b>-0.55(-0.99,-0.12)</b> | <b>0.013</b> | -0.19(-0.52,0.13) | 0.238   |
|                                  | <3                                   | 0.0 (ref.)                |              | 0.0 (ref.)        |         |
| Visual-Motor<br>Processing Speed | $\geq 3$                             | <b>-0.30(-0.60,-0.01)</b> | <b>0.047</b> | -0.31(-0.65,0.02) | 0.066   |
|                                  | <3                                   | 0.0 (ref.)                |              | 0.0 (ref.)        |         |
| Motor Processing<br>Speed        | $\geq 3$                             | <b>-0.37(-0.70,-0.05)</b> | <b>0.033</b> | -0.05(-0.35,0.25) | 0.746   |
|                                  | <3                                   | 0.0 (ref.)                |              | 0.0 (ref.)        |         |
| Visual Processing<br>Speed       | $\geq 3$                             | <b>-0.34(-0.63,-0.04)</b> | <b>0.024</b> | -0.12(-0.48,0.24) | 0.512   |
|                                  | <3                                   | 0.0 (ref.)                |              | 0.0 (ref.)        |         |
| Verbal Learning                  | $\geq 3$                             | <b>-0.42(-0.73,-0.10)</b> | <b>0.011</b> | -0.17(-0.55,0.21) | 0.380   |
|                                  | <3                                   | 0.0 (ref.)                |              | 0.0 (ref.)        |         |
| Short-Term Recall                | $\geq 3$                             | <b>-0.42(-0.74,-0.11)</b> | <b>0.010</b> | -0.34(-0.75,0.07) | 0.104   |
|                                  | <3                                   | 0.0 (ref.)                |              | 0.0 (ref.)        |         |
| Long-Term Recall                 | $\geq 3$                             | <b>-0.35(-0.70,-0.00)</b> | <b>0.050</b> | -0.40(-0.82,0.01) | 0.057   |
|                                  | <3                                   | 0.0 (ref.)                |              | 0.0 (ref.)        |         |
| Cognitive Flexibility            | $\geq 3$                             | <b>-0.58(-0.97,-0.19)</b> | <b>0.006</b> | -0.09(-0.49,0.31) | 0.672   |
|                                  | <3                                   | 0.0 (ref.)                |              | 0.0 (ref.)        |         |

HL; Hodgkin lymphoma survivors. Bolded results are statistically significant at  $p < 0.05$ . <sup>1</sup>One model was run for each biomarker-neurocognitive outcome pair adjusted for age, race, smoking, BMI, anti-inflammatory/steroid, recent infection. <sup>2</sup> Tertiles of biomarker concentrations were defined based on the control distribution, <sup>3</sup> a cut point of 3mg/L was chosen for HS-CRP because this is an established, clinically significant level of inflammation associated with adverse cardiovascular events.
