# Supplementary material
Source: PubMed Central journal article supplement (PMC11062814)
Supplement: NIHMS1970930-supplement-6.pdf [file NIHMS1970930-supplement-6.pdf]

|                                    |                  |               |               |              |              |              |                  |               |               |              |
|------------------------------------|------------------|---------------|---------------|--------------|--------------|--------------|------------------|---------------|---------------|--------------|
|                                    | Neurologic       | -0.238        | -0.691        | 0.001        | 0.145        | 0.144        | 0.044            | -0.023        | -0.068        | 0.149        |
|                                    | Homocysteine     | -0.162        | -0.597        | 0.038        |              |              |                  |               |               |              |
|                                    |                  |               |               |              |              |              |                  |               |               |              |
| <b>Any Grade 3-4 Condition</b>     |                  |               |               |              |              |              |                  |               |               |              |
| Focused Attention                  |                  |               |               |              |              |              |                  |               |               |              |
|                                    | Grade 3-4        | 0.046         | 1.579         | 0.228        | 0.004        | 0.011        | 0.938            | 0.004         | 0.125         | 0.938        |
|                                    | hs-CRP           | 0.844         | 10.928        | <0.001       |              |              |                  |               |               |              |
| CPT Omissions                      |                  |               |               |              |              |              |                  |               |               |              |
|                                    | Grade 3-4        | 0.155         | -0.005        | 0.998        | 0.000        | 0.000        | 0.998            | 0.000         | -0.005        | 0.998        |
|                                    | hs-CRP           | -0.848        | -11.414       | <0.001       |              |              |                  |               |               |              |
| Visuomotor Processing Speed        |                  |               |               |              |              |              |                  |               |               |              |
|                                    | Grade 3-4        | -0.110        | -0.212        | 0.116        | -0.004       | -0.012       | 0.937            | -0.001        | -0.001        | 0.937        |
|                                    | hs-CRP           | 0.145         | 0.104         | 0.117        |              |              |                  |               |               |              |
| <b>Visuomotor Processing Speed</b> |                  |               |               |              |              |              |                  |               |               |              |
|                                    | <b>Grade 3-4</b> | <b>-0.070</b> | <b>-0.134</b> | <b>0.338</b> | <b>0.225</b> | <b>1.094</b> | <b>&lt;0.001</b> | <b>-0.043</b> | <b>-0.082</b> | <b>0.065</b> |
|                                    | <b>IL-6</b>      | <b>-0.190</b> | <b>-0.075</b> | <b>0.039</b> |              |              |                  |               |               |              |
| Visual Processing Speed            |                  |               |               |              |              |              |                  |               |               |              |
|                                    | Grade 3-4        | -0.085        | -0.217        | 0.238        | -0.005       | -0.014       | 0.925            | 0.001         | 0.002         | 0.926        |
|                                    | hs-CRP           | -0.117        | -0.111        | 0.213        |              |              |                  |               |               |              |
| Grooved Peg Board                  |                  |               |               |              |              |              |                  |               |               |              |
|                                    | Grade 3-4        | -0.183        | -0.429        | 0.009        | -0.005       | -0.012       | 0.934            | -0.001        | -0.001        | 0.934        |
|                                    | hs-CRP           | 0.134         | 0.117         | 0.149        |              |              |                  |               |               |              |
| Verbal Learning                    |                  |               |               |              |              |              |                  |               |               |              |
|                                    | Grade 3-4        | -0.139        | -0.280        | 0.048        | -0.005       | -0.012       | 0.934            | 0.000         | 0.000         | 0.936        |
|                                    | hs-CRP           | 0.030         | 0.022         | 0.750        |              |              |                  |               |               |              |
| Cognitive Flexibility              |                  |               |               |              |              |              |                  |               |               |              |
|                                    | Grade 3-4        | -0.072        | -0.145        | 0.325        | -0.004       | -0.012       | 0.937            | 0.000         | 0.000         | 0.938        |
|                                    | hs-CRP           | 0.033         | 0.025         | 0.730        |              |              |                  |               |               |              |
| <b>Smoking</b>                     |                  |               |               |              |              |              |                  |               |               |              |
| Short-term Verbal Recall           |                  |               |               |              |              |              |                  |               |               |              |
|                                    | Current Smoker   | -0.242        | -0.600        | 0.001        | 0.118        | 0.101        | 0.093            | -0.008        | -0.019        | 0.454        |
|                                    | Former Smoker    | -0.050        | -0.131        | 0.504        | 0.136        | 0.124        | 0.061            | -0.009        | -0.024        | 0.435        |
|                                    | Homocysteine     | -0.066        | -0.190        | 0.399        |              |              |                  |               |               |              |
| Long-term Verbal Recall            |                  |               |               |              |              |              |                  |               |               |              |

|                             |                |        |        |        |        |        |       |        |        |       |
|-----------------------------|----------------|--------|--------|--------|--------|--------|-------|--------|--------|-------|
|                             | Current Smoker | -0.289 | -0.802 | <0.001 | 0.118  | 0.101  | 0.092 | -0.010 | -0.029 | 0.351 |
|                             | Former Smoker  | -0.059 | -0.172 | 0.427  | 0.136  | 0.123  | 0.062 | -0.012 | -0.035 | 0.325 |
|                             | Homocysteine   | -0.087 | -0.282 | 0.258  |        |        |       |        |        |       |
| Sustained Attention         |                |        |        |        |        |        |       |        |        |       |
|                             | Current Smoker | -0.291 | -0.981 | <0.001 | 0.116  | 0.100  | 0.098 | -0.009 | -0.029 | 0.396 |
|                             | Former Smoker  | -0.079 | -0.280 | 0.285  | 0.138  | 0.125  | 0.058 | -0.010 | -0.037 | 0.380 |
|                             | Homocysteine   | -0.075 | -0.292 | 0.326  |        |        |       |        |        |       |
| Visuomotor Processing Speed |                |        |        |        |        |        |       |        |        |       |
|                             | Current Smoker | -0.284 | -0.698 | <0.001 | 0.116  | 0.100  | 0.098 | -0.020 | -0.049 | 0.173 |
|                             | Former Smoker  | -0.029 | -0.075 | 0.678  | 0.136  | 0.124  | 0.061 | -0.023 | -0.061 | 0.139 |
|                             | Homocysteine   | -0.172 | -0.490 | 0.017  |        |        |       |        |        |       |
| Short-term Verbal Recall    |                |        |        |        |        |        |       |        |        |       |
|                             | Current Smoker | -0.270 | -0.671 | 0.133  | 0.125  | 0.085  | 0.076 | 0.027  | 0.066  | 0.133 |
|                             | Former Smoker  | -0.054 | -0.142 | 0.456  | -0.015 | -0.011 | 0.840 | -0.003 | -0.008 | 0.840 |
|                             | Platelets      | 0.212  | 0.778  | 0.004  |        |        |       |        |        |       |
| Sustained Attention         |                |        |        |        |        |        |       |        |        |       |
|                             | Current Smoker | -0.302 | -1.011 | <0.001 | 0.042  | 0.106  | 0.566 | -0.001 | -0.002 | 0.850 |
|                             | Former Smoker  | -0.086 | -0.306 | 0.249  | 0.211  | 0.575  | 0.003 | -0.003 | -0.011 | 0.842 |
|                             | TNFa           | -0.014 | -0.019 | 0.842  |        |        |       |        |        |       |
| Long-term Verbal Recall     |                |        |        |        |        |        |       |        |        |       |
|                             | Current Smoker | -0.291 | -0.801 | <0.001 | 0.184  | 0.871  | 0.011 | -0.012 | -0.032 | 0.400 |
|                             | Former Smoker  | -0.069 | -0.204 | 0.340  | 0.012  | 0.062  | 0.869 | -0.001 | -0.002 | 0.871 |
|                             | MDA            | -0.063 | -0.037 | 0.372  |        |        |       |        |        |       |
| Long-term Verbal Recall     |                |        |        |        |        |        |       |        |        |       |

|                          |                |        |        |        |        |        |       |        |        |       |
|--------------------------|----------------|--------|--------|--------|--------|--------|-------|--------|--------|-------|
|                          |                |        |        |        |        |        |       |        |        |       |
|                          | Current Smoker | -0.298 | -0.822 | <0.001 | -0.050 | -0.067 | 0.503 | -0.004 | -0.011 | 0.560 |
|                          | Former Smoker  | -0.082 | -0.242 | 0.262  | 0.140  | 0.203  | 0.060 | 0.012  | -0.035 | 0.320 |
|                          | OxLDL          | 0.084  | 0.170  | 0.240  |        |        |       |        |        |       |
| Short-term Verbal Recall |                |        |        |        |        |        |       |        |        |       |
|                          | Current Smoker | -0.244 | -0.603 | 0.001  | -0.050 | -0.067 | 0.503 | -0.007 | -0.018 | 0.524 |
|                          | Former Smoker  | -0.078 | -0.206 | 0.286  | 0.140  | 0.203  | 0.060 | 0.020  | 0.054  | 0.167 |
|                          | OxLDL          | 0.146  | 0.263  | 0.040  |        |        |       |        |        |       |

Abbreviations: Std Est, standardized estimate; Unstd Est, unstandardized estimate; CHC, chronic health condition; CVD: Cardiovascular disease; HS-CRP, c-reactive protein; IL-6, interleukin-6; Gpx: glutathione peroxidase; MDA: Malondialdehyde; TNF- $\alpha$ : tumor necrosis factor -alpha. Bolded results indicate associations with statistical significance worth pursuing in future investigations ( $p < 0.10$ )

<sup>1</sup> Mediation was explored for any neurocognitive outcome associated ( $p < 0.10$ ) with a given biomarker and chronic health conditions or smoking. Individual models were run for each potential mediation pathway. Models were adjusted for age at evaluation and sex. Standardized estimates refer to standardized coefficient estimates for each path. Unstandardized estimates refer to the unstandardized coefficient estimates for each path.

<sup>2</sup> Chronic health conditions were categorized as any grade 2 or higher cardiovascular, pulmonary, neurologic, or endocrine condition. Cardiovascular group 1 included hypertension and dyslipidemia and cardiovascular group 2 included all other conditions. We also examined any grade 3-4 condition.

<sup>3</sup> P-values are derived from probit model with a robust weighted least squares estimator (WLSMV). All P-values are two-sided.
