# Supplementary material
Source: PubMed Central journal article supplement (PMC11062814)
Supplement: NIHMS1970930-supplement-7.pdf [file NIHMS1970930-supplement-7.pdf]

**Supplemental Table 5: Representativeness of Study Participants**

| Cancer type(s)/subtype(s)/stage(s)/condition | Pediatric Hodgkin Lymphoma                                                                                                                                                                                                                                                                                                                     |
|----------------------------------------------|------------------------------------------------------------------------------------------------------------------------------------------------------------------------------------------------------------------------------------------------------------------------------------------------------------------------------------------------|
| Considerations related to:                   |                                                                                                                                                                                                                                                                                                                                                |
| Sex                                          | Pediatric Hodgkin lymphoma has a well balanced sex distribution, but affects males slightly more often than females (incidence rate 1.3 vs 1.2 per 100,000). In our sample 48% of participants were male, which is consistent with the epidemiology of pediatric Hodgkin lymphoma.                                                             |
| Age                                          | Hodgkin lymphoma has a bimodal age distribution which peaks in adolescents and again in late adulthood. We specifically focused on pediatric Hodgkin lymphoma cases diagnosed below of the age of 23. The age range of the participants included ranges from 3 to 22.6 years encompasses the entire pediatric spectrum.                        |
| Race/ethnicity                               | In the USA, approximately 85% of all new pediatric Hodgkin lymphoma diagnoses are among White patients, which is consistent with our sample (84%).                                                                                                                                                                                             |
| Geography                                    | We recruited patients with Hodgkin lymphoma treated at St. Jude Children's Research Hospital in Memphis, TN. The catchment area for this hospital encompasses several states in the mid south, however, patients may be referred from anywhere in the country to receive treatment, increasing the geographical generalizability of our study. |
| Other considerations                         | N/A                                                                                                                                                                                                                                                                                                                                            |
| Overall representativeness of this study     | We feel that our study sample, in general, reflects the age, sex, and race/ethnicity distribution of the pediatric Hodgkin lymphoma cases diagnosed in the US each year.                                                                                                                                                                       |
