# Supplementary material
Source: PubMed Central journal article supplement (PMC11062814)

**Supplemental Figure 1: Participation flow chart:**

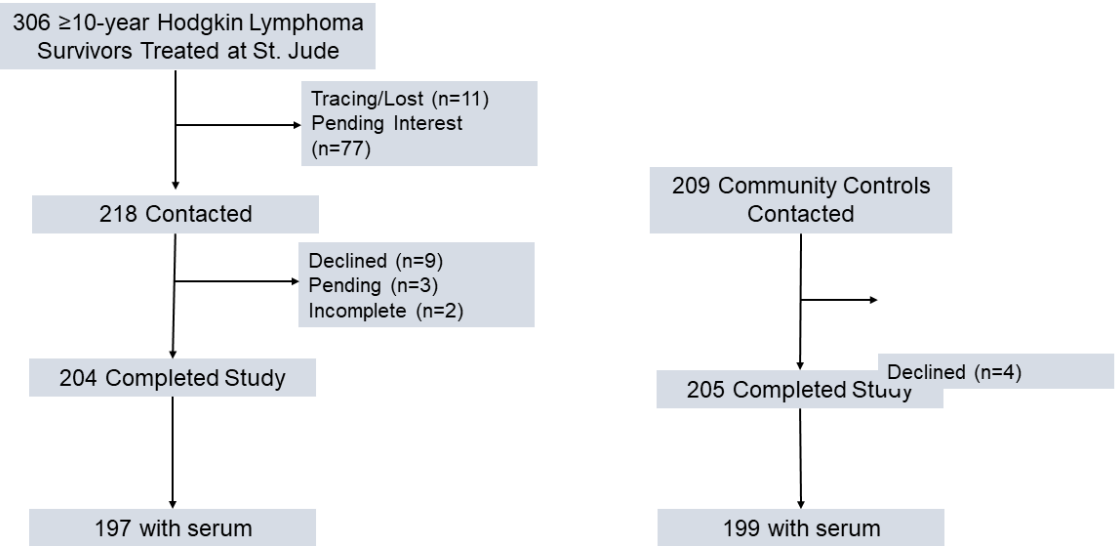

Supplement: NIHMS1970930-supplement-2.pdf [file NIHMS1970930-supplement-2.pdf]
